# Supplementary material
Source: PubMed Central journal article supplement (PMC6198652)
Supplement: NIHMS984103-supplement-1.pdf [file NIHMS984103-supplement-1.pdf]

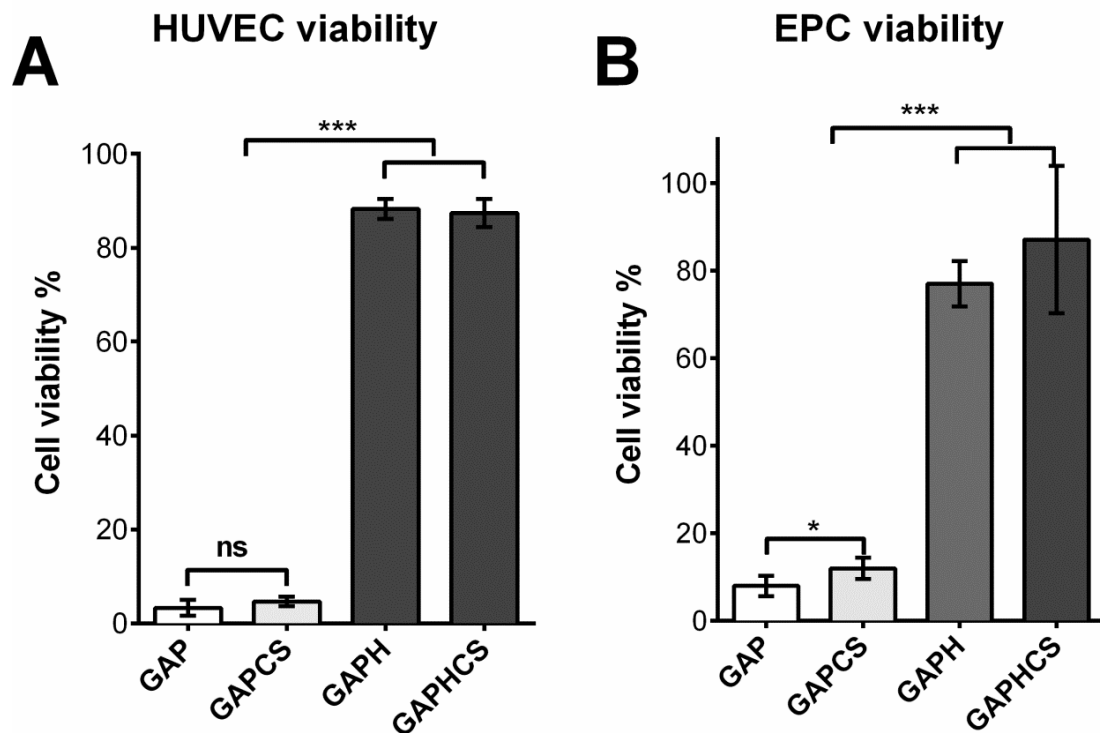

**Figure S1. Cell viability of human vein endothelial cells and endothelial progenitors in contact with fixed pericardium after chemical reduction and addition of chondroitin sulfate hydrogel.** Cell Viability of **A**, HUVEC and **B**, EPC seeded on glutaraldehyde-fixed pericardium (GAP) alone or with CS hydrogel (GAPCS), or on fixed and reduced pericardium (GAPH) alone or with CS hydrogel (GAPHCS). For viability, 5 replicates per group are analyzed using MTS after 3 days. Histograms are plotted as mean  $\pm$  SEM. \*  $p < 0.05$ , \*\*\*  $p < 0.001$ .
