# Supplementary material
Source: PubMed Central journal article supplement (PMC6198652)
Supplement: NIHMS984103-supplement-2.pdf [file NIHMS984103-supplement-2.pdf]

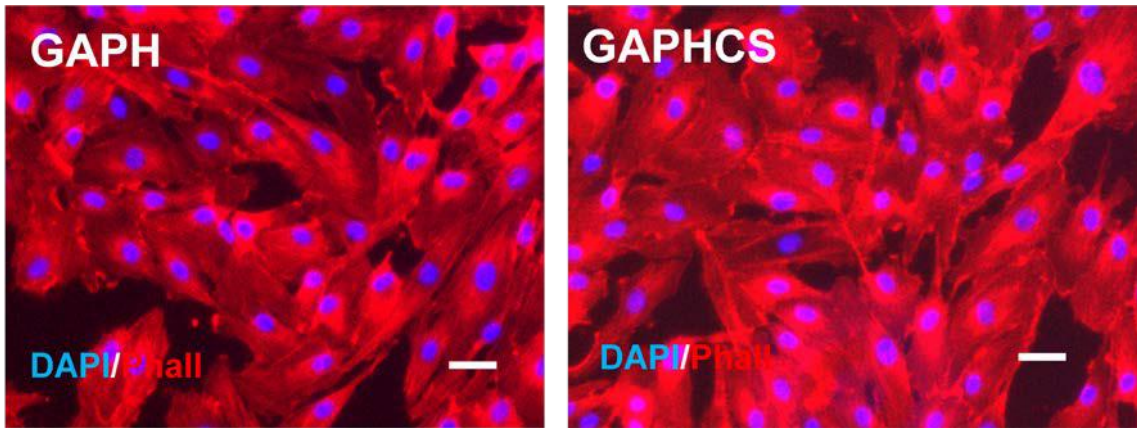

**Figure S2.** High magnification images of actin staining with phalloidin-TRITC (red) and DAPI (cyan) in human aorta endothelial cells (HAEC) seeded on glutaraldehyde-fixed and reduced pericardium (GAPH) alone or with CS hydrogel (GAPHCS) to analyze endothelial cell health; scale bar 25  $\mu\text{m}$ . Magnification 200x.
