# Supplementary material
Source: PubMed Central journal article supplement (PMC6198652)
Supplement: NIHMS984103-supplement-3.pdf [file NIHMS984103-supplement-3.pdf]

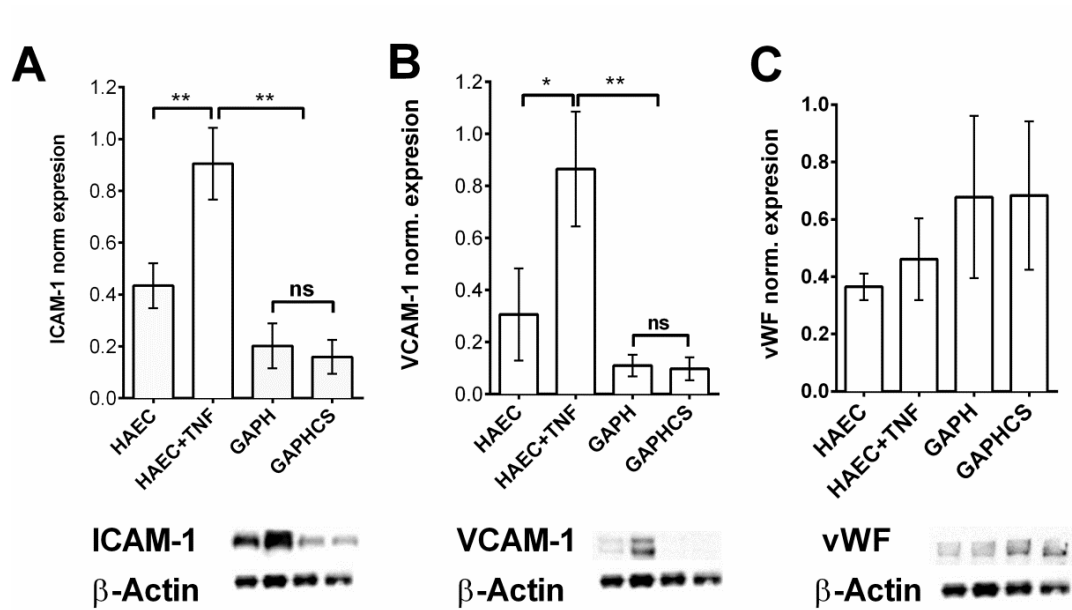

**Figure S3. Evaluation of the inflammatory state and health of human aortic endothelial cells in contact with tumor necrosis factor alpha or glutaraldehyde-fixed leaflets.** Expression of the pro-inflammatory markers ICAM-1 (**A**) and VCAM-1 (**B**) and the synthesis of von Willebrand Factor vWF (**C**) in human aortic endothelial cell (HAEC) in the presence or the absence of tumor necrosis factor  $\alpha$  (TNF- $\alpha$ , 10 ng/mL) as positive control or seeded on glutaraldehyde-fixed and reduced pericardium (GAPH) alone or with CS hydrogel (GAPHCS) for 7 days of incubation. Histograms are plotted as mean  $\pm$  SEM. \*  $p < 0.05$ , \*\*  $p < 0.01$ .
